# Supplementary material
Source: publisher figshare collection journal article supplement (https://acs.figshare.com/ndownloader/files/22494959)
Supplement: Supplementary file 1 [file 22494959]

## Supporting Information

### **Novel Solid Electrolyte CO<sub>2</sub> Gas Sensors Based on c-Axis-Oriented Y-doped La<sub>9.66</sub>Si<sub>5.3</sub>B<sub>0.7</sub>O<sub>26.14</sub>**

Nan Ma <sup>†</sup>, Shingo Ide <sup>‡,§</sup>, Koichi Suematsu <sup>†</sup>, Ken Watanabe <sup>†</sup>, Kengo Shimanoe <sup>†,\*</sup>

<sup>†</sup> Department of Advanced Materials Science and Engineering, Faculty of Engineering Sciences, Kyushu University, Kasuga, Fukuoka, 816-8580, Japan

<sup>‡</sup> Department of Molecular and Material Sciences, Interdisciplinary Graduate School of Engineering Sciences, Kyushu University, Kasuga, Fukuoka, 816-8580, Japan

<sup>§</sup> Engineered Materials Sector R&D Center, Mitsui Mining & Smelting Co., LTD., Ageo, Saitama, 362-0021, Japan

\*To whom correspondence should be addressed:

shimanoe.kengo.695@m.kyushu-u.ac.jp.

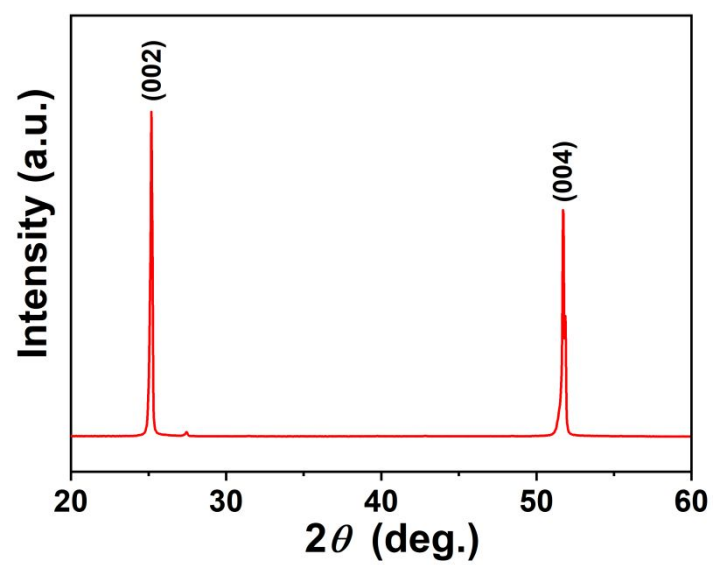

**Figure S1** XRD pattern of Y-LSBO ceramic.
